# Supplementary material for: Lattice Distortion in Co3O4/Mn3O4-Guided Synthesis via Carbon Nanotubes for Efficient Lean Methane Combustion
Source: MDPI journal article supplement (doi:10.3390/catal13071112), 2023-07-17
Supplement: s1 [file s1]

# Lattice Distortion in $\text{Co}_3\text{O}_4/\text{Mn}_3\text{O}_4$ Guided Synthesis via Carbon Nanotubes for Efficient Lean Methane Combustion

Xinfang Wei<sup>1,\*</sup>, Ke Yang<sup>1</sup>, Qinghan Zhu<sup>1</sup>, Jinlong Li<sup>1</sup>, Jian Qi<sup>2,3\*</sup>, Haiwang Wang<sup>1,\*</sup>

<sup>1</sup>Key Laboratory of Dielectric and Electrolyte Functional Material Hebei Province, Northeastern University at Qinhuangdao, Qinhuangdao 066004, China.

<sup>2</sup>State Key Laboratory of Biochemical Engineering, Institute of Process Engineering, Chinese Academy of Sciences, Beijing 100190, China.

<sup>3</sup>School of Chemical Engineering, University of Chinese Academy of Sciences, Beijing 100049, China.

\*Correspondence: weixinfang@neuq.edu.cn (X. Wei); jq@ipe.ac.cn (J. Qi); whwdbdx@neuq.edu.cn (H. Wang).

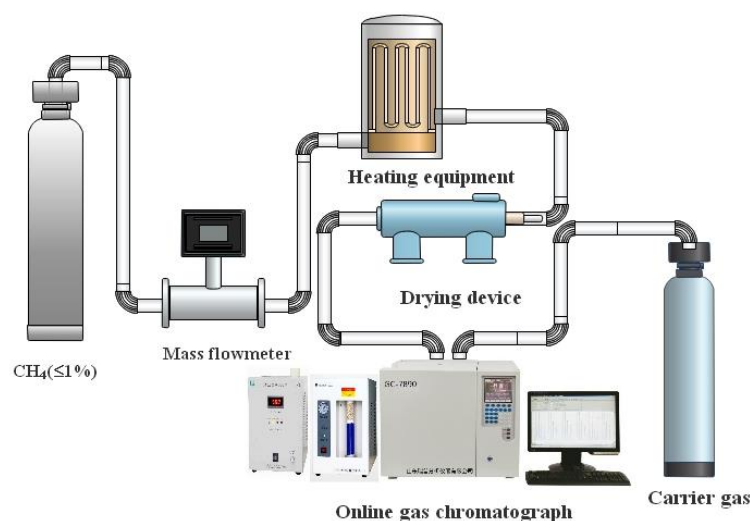

**Figure S1.** Schematic diagram of the experimental set-up.

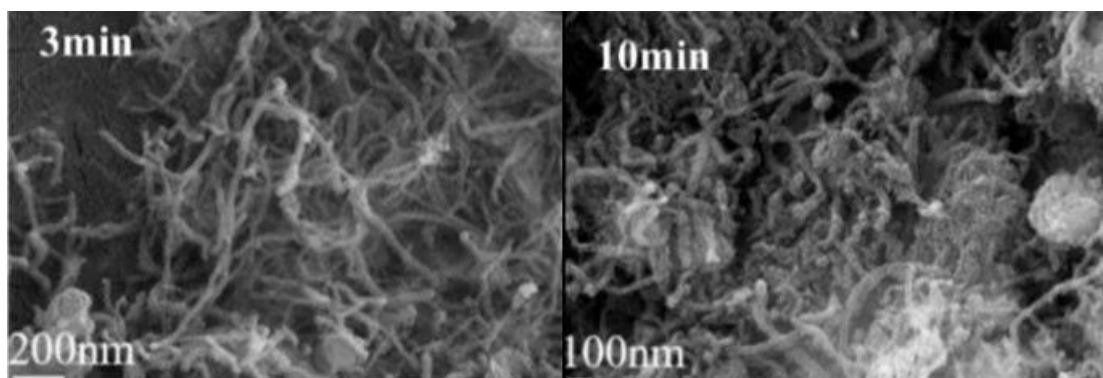

**Figure S2.** SEM images of  $\text{Co}_3\text{O}_4$  nano-sheet prepared at annealing times of 3 and 10 min.

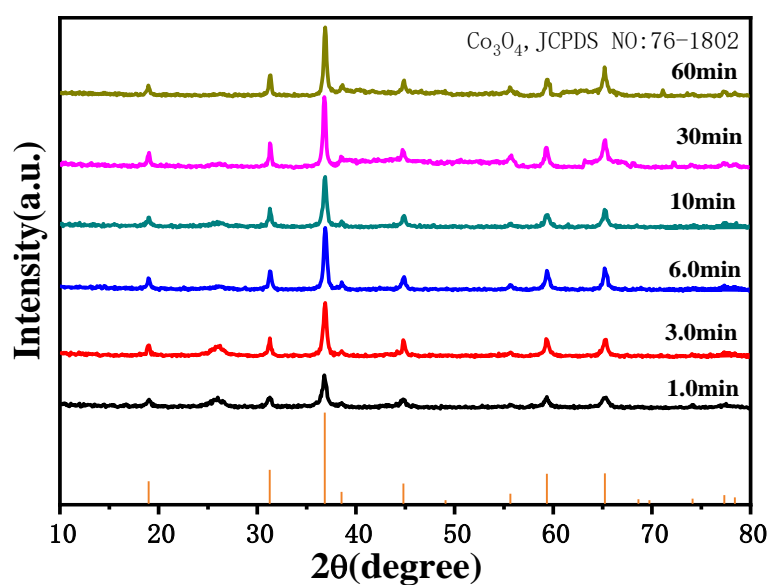

**Figure S3.** XRD patterns of  $\text{Co}_3\text{O}_4$  nano-sheet prepared at different annealing times, and JCPDS card is from ref. 50 in the main text.

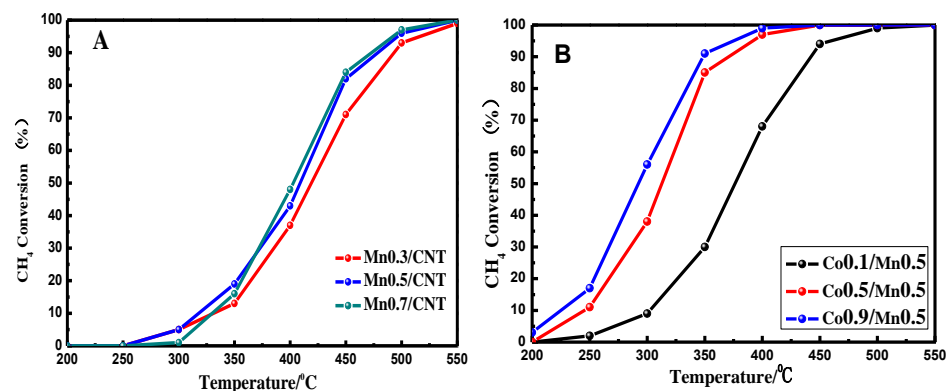

**Figure S4.** CH<sub>4</sub> conversion from 200 to 550 °C over MnO<sub>2</sub>/CNT and Co<sub>3</sub>O<sub>4</sub>/ Mn<sub>3</sub>O<sub>4</sub> catalysts.

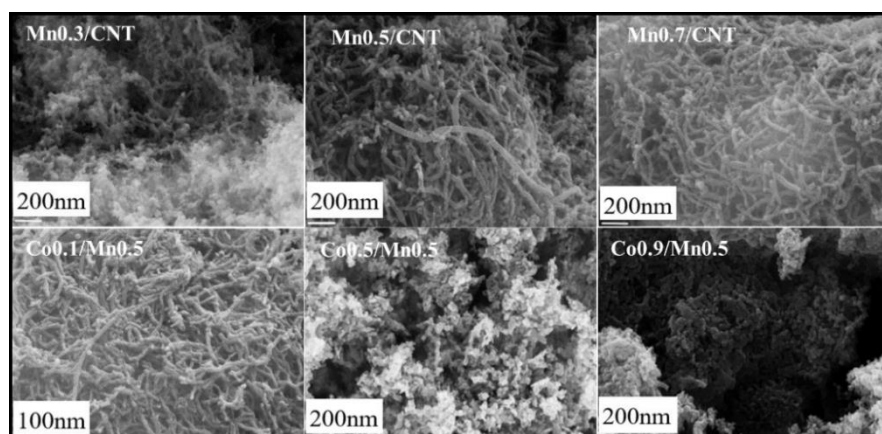

**Figure S5.** SEM images of MnO<sub>2</sub>/CNT and Co<sub>3</sub>O<sub>4</sub>/Mn<sub>3</sub>O<sub>4</sub> catalysts.

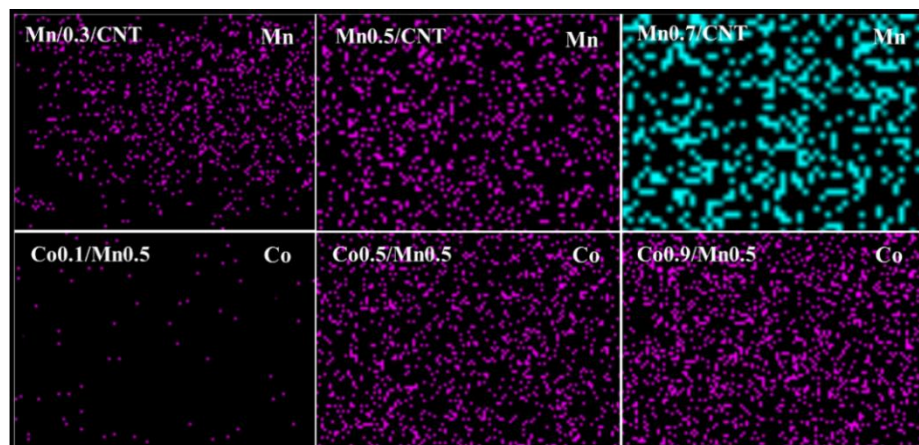

Figure S6. EDS images of MnO<sub>2</sub>/CNT and Co<sub>3</sub>O<sub>4</sub>/Mn<sub>3</sub>O<sub>4</sub> catalysts.

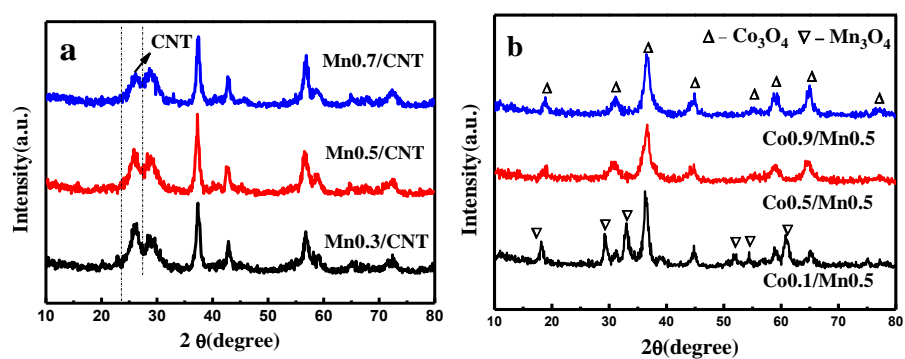

Figure S7. XRD patterns of MnO<sub>2</sub>/CNT (a) and Co<sub>3</sub>O<sub>4</sub>/Mn<sub>3</sub>O<sub>4</sub> catalysts (b).

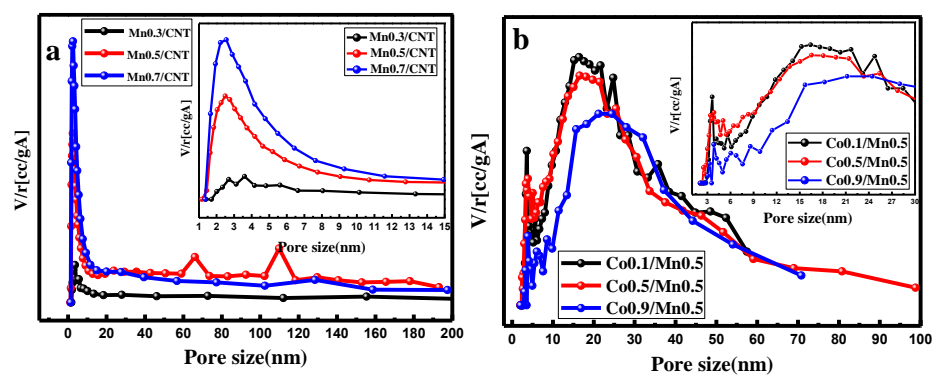

Figure S8. Pore size distributions of MnO<sub>2</sub>/CNT (a) and Co<sub>3</sub>O<sub>4</sub>/Mn<sub>3</sub>O<sub>4</sub> catalysts (b).

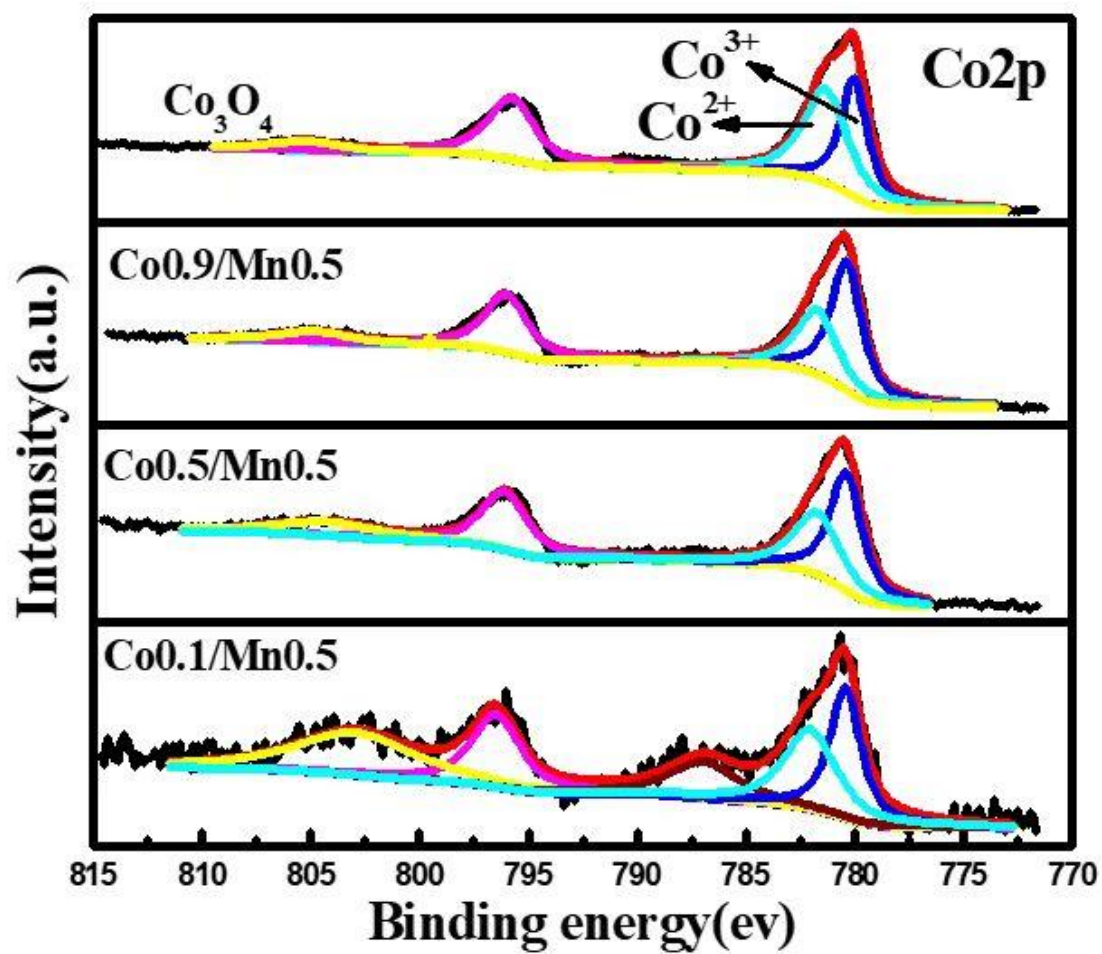

**Figure S9.** XPS spectra of  $\text{Co}^{3+}/\text{Co}^{2+}$  on the surface of  $\text{Co}_3\text{O}_4/\text{Mn}_3\text{O}_4$  nano-sheet catalyst with different cobalt-manganese ratios.

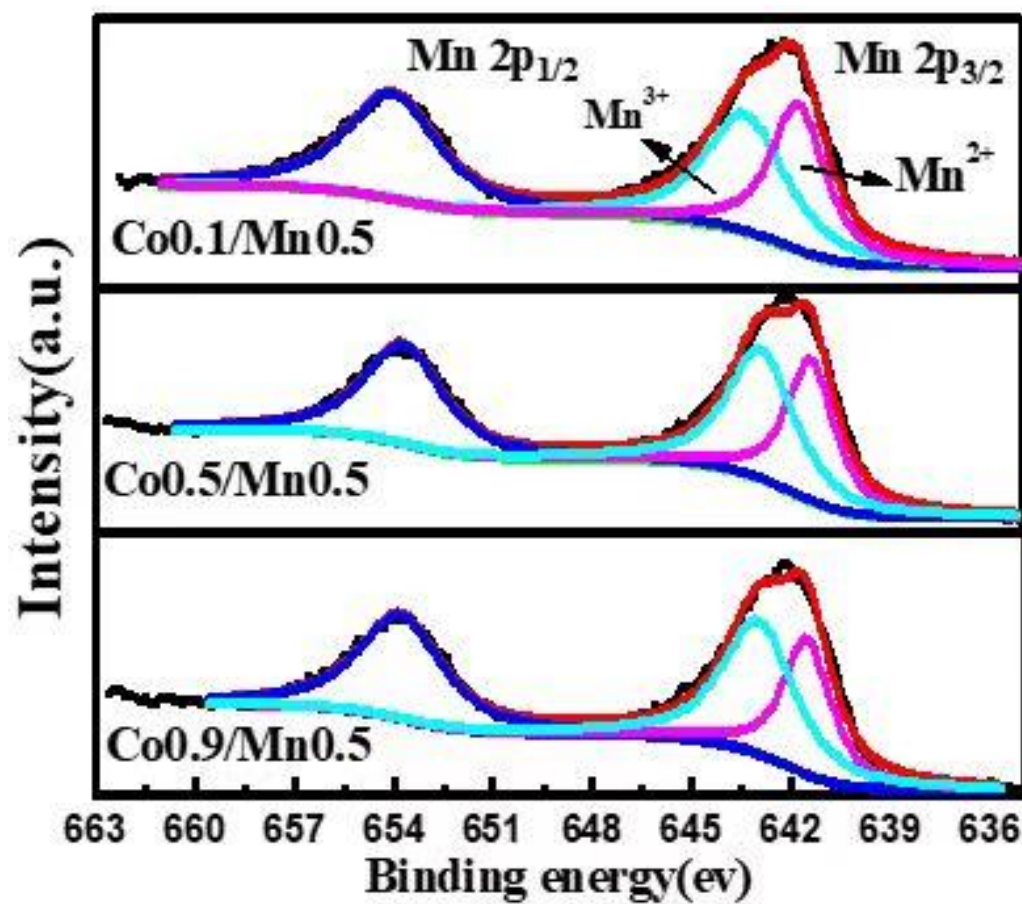

**Figure S10.** XPS spectra of Mn<sup>3+</sup>/Mn<sup>2+</sup> on the surface of Co<sub>3</sub>O<sub>4</sub>/Mn<sub>3</sub>O<sub>4</sub> nano-sheet catalyst with different cobalt-manganese ratios.

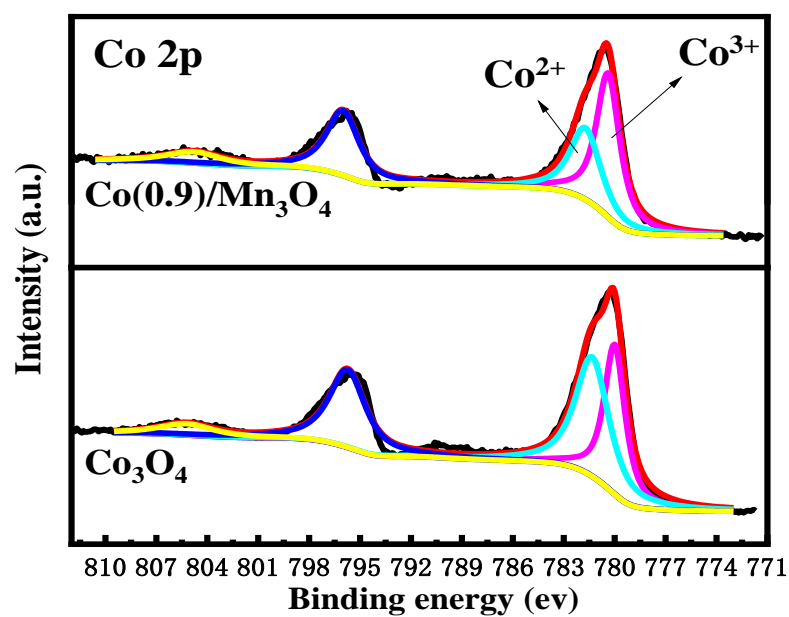

**Figure S11.** XPS spectra of  $\text{Co}_3\text{O}_4$  and  $\text{Co}_{0.9}\text{Mn}_{0.5}\text{O}_4$  nano-catalysts.

According to XPS calculation from Figure S11, the  $\text{Co}^{3+}/\text{Co}^{2+}$  ratios of  $\text{Co}_3\text{O}_4$  and  $\text{Co}_{0.9}\text{Mn}_{0.5}\text{O}_4$  nano-catalysts were found to be 0.79 and 1.55, respectively. Therefore, the doping of Mn can lead to an increase in the  $\text{Co}^{3+}/\text{Co}^{2+}$  ratio of  $\text{Co}_{0.9}\text{Mn}_{0.5}\text{O}_4$  nanosheets, thereby increasing the migration rate of active oxygen and improving the catalytic activity.

**Table S1.** Pore parameters of the materials.

| Sample      | Average Pore Size (nm) | Surface Area (m <sup>2</sup> g <sup>-1</sup> ) | Total Pore Volume (cm <sup>3</sup> g <sup>-1</sup> ) |
|-------------|------------------------|------------------------------------------------|------------------------------------------------------|
| Mn0.3/CNT   | 29.86                  | 144.18                                         | 0.91                                                 |
| Mn0.7/CNT   | 20.48                  | 170.53                                         | 0.63                                                 |
| Co0.1/Mn0.5 | 35.88                  | 39.37                                          | 0.35                                                 |
| Co0.5/Mn0.5 | 27.06                  | 62.58                                          | 0.39                                                 |

**Table S2.** Crystal face index, full width at half maximum, and grain size of CNT and Co<sub>3</sub>O<sub>4</sub> nano-sheet catalysts prepared at different annealing times at 1 min, 6 min, 30 min, and 60 min.

| Time/min | hkl   | FWHM  | D/Å |
|----------|-------|-------|-----|
| 1        | (111) | 0.782 | 104 |
|          | (220) | 0.763 | 109 |
|          | (311) | 1.158 | 73  |
|          | (400) | 0.736 | 118 |
|          | (511) | 0.918 | 100 |
|          | (440) | 1.013 | 93  |
| 6        | (111) | 0.761 | 107 |
|          | (220) | 1.313 | 63  |
|          | (311) | 1.131 | 74  |
|          | (400) | 0.761 | 114 |
|          | (511) | 0.976 | 94  |
|          | (440) | 0.982 | 96  |
| 30       | (111) | 0.748 | 109 |
|          | (220) | 1.016 | 82  |
|          | (311) | 0.903 | 93  |
|          | (400) | 0.725 | 120 |
|          | (511) | 0.908 | 101 |
|          | (440) | 0.946 | 100 |
| 60       | (111) | 0.601 | 136 |
|          | (220) | 0.652 | 128 |
|          | (311) | 0.834 | 101 |
|          | (400) | 0.793 | 109 |
|          | (511) | 0.861 | 107 |
|          | (440) | 1.144 | 83  |
